# Supplementary material for: Simultaneous Inhibition of Ceramide Hydrolysis and Glycosylation Synergizes to Corrupt Mitochondrial Respiration and Signal Caspase Driven Cell Death in Drug-Resistant Acute Myeloid Leukemia
Source: MDPI journal article supplement (doi:10.3390/cancers15061883), 2023-03-21

Figure S1. Full western blots of AML cell lines for Figure 2E. Red line were cut out and used for the figure.

**P-gp Full western blots**

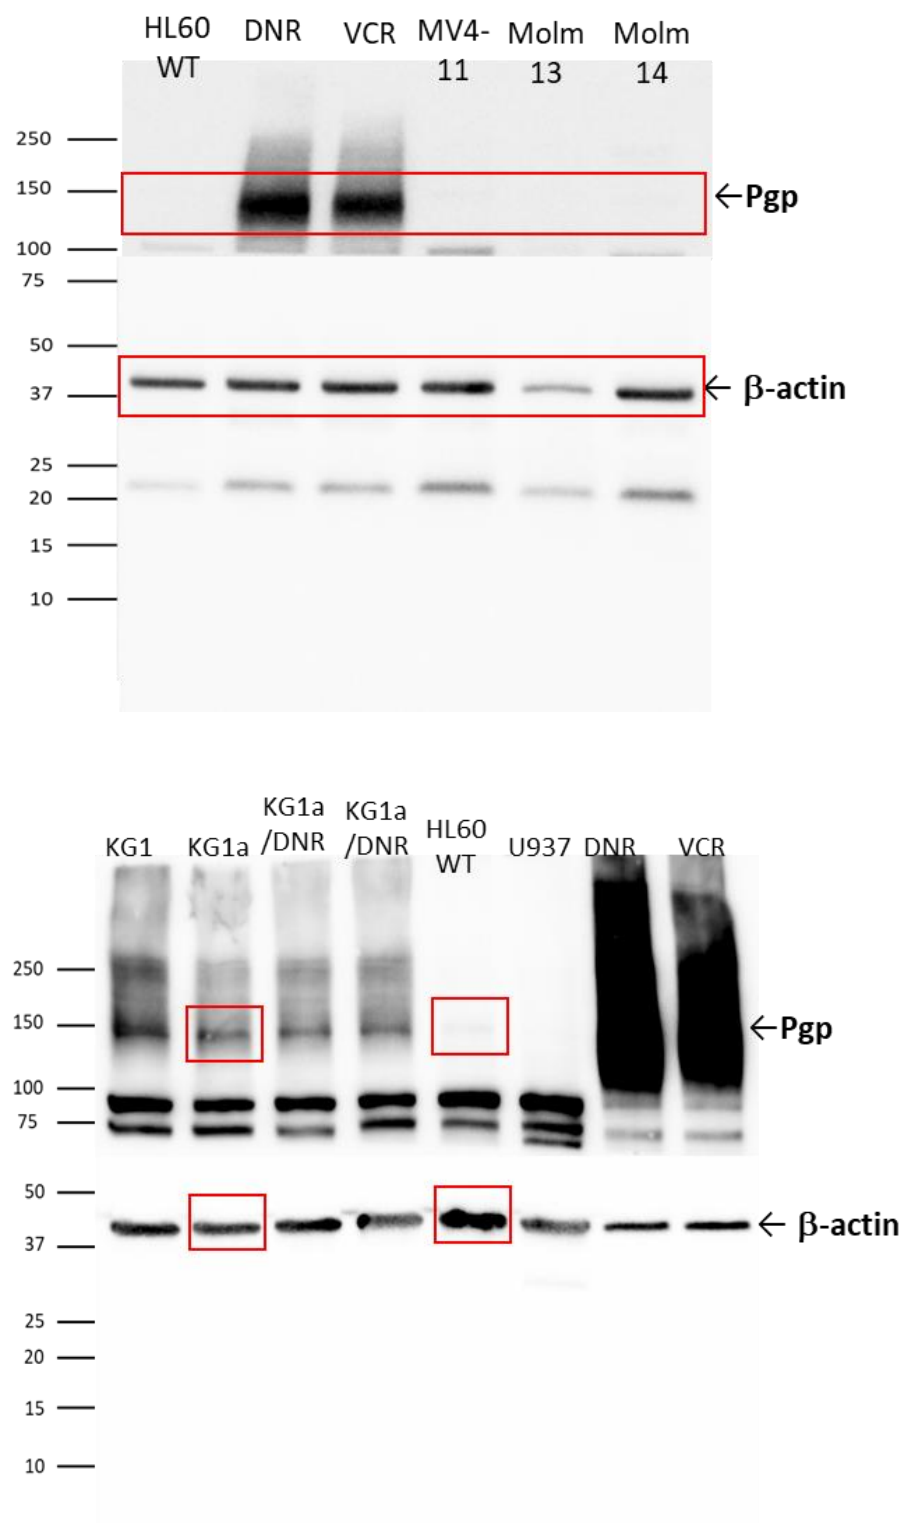

Figure S2. Full western blots of HL-60/DNR cell line treated in control and mix (SACLAC + D-*threo*-PDMP, 5 + 10  $\mu$ M, except pGSK-3 $\beta$  was 10 + 20) for Figure 5B. Red line were cut out and used for the figure.

**pAkt Full western blots**

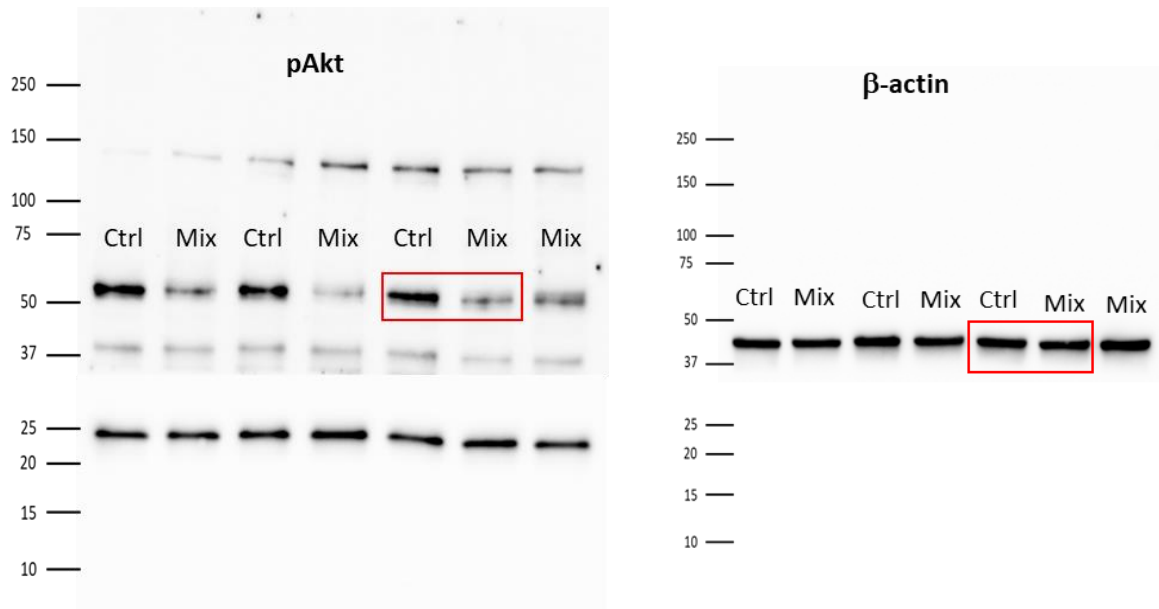

**pGSK3b Full western blots**

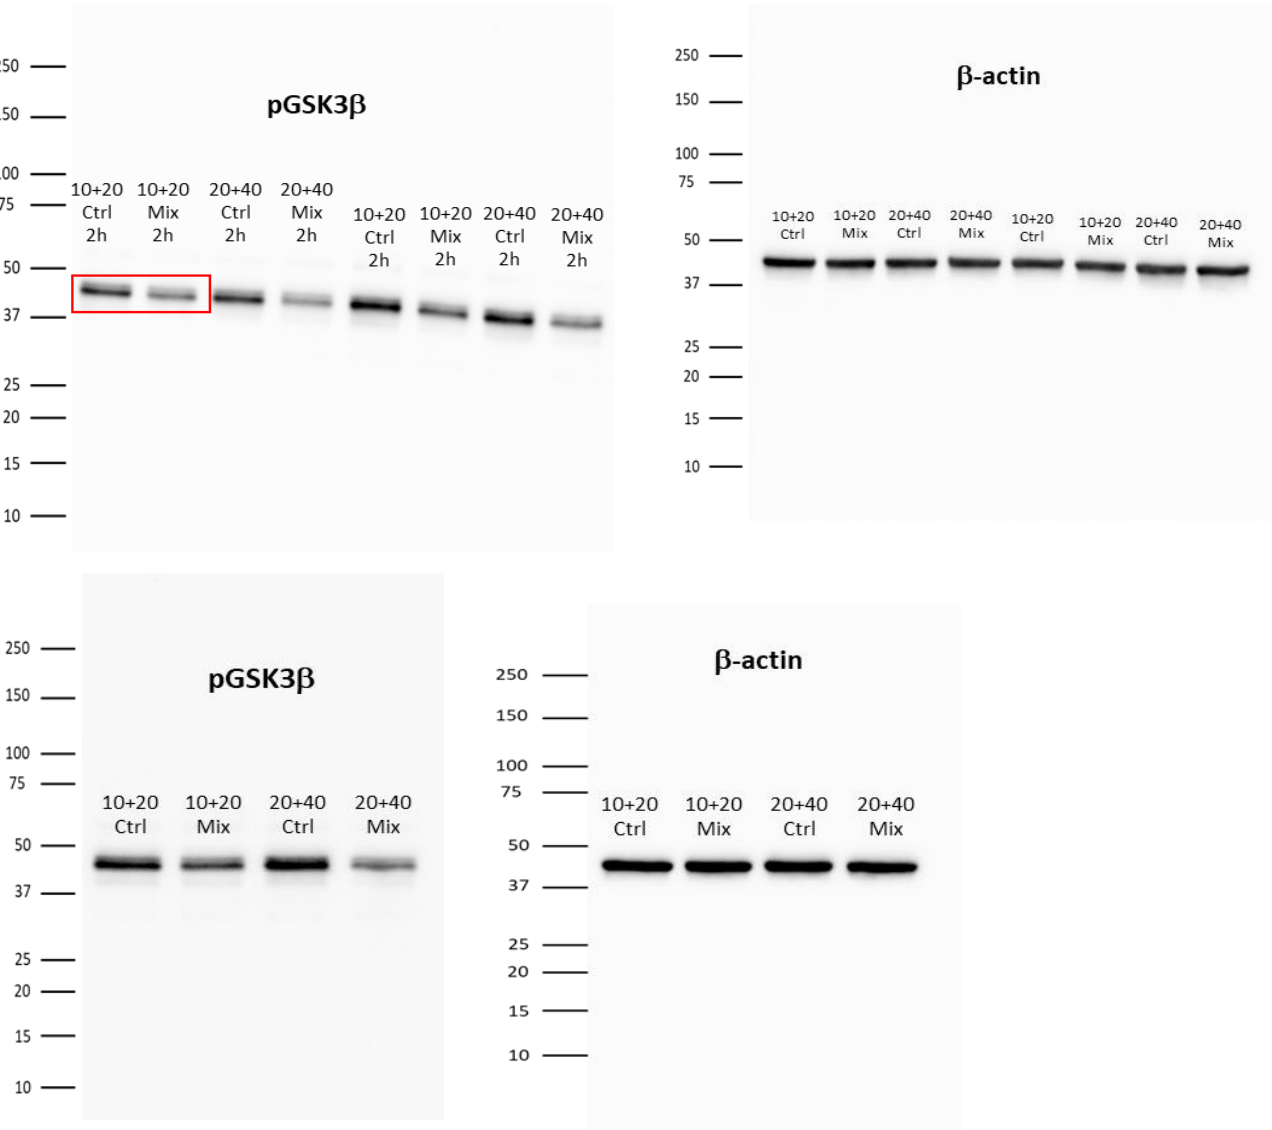

Mcl-1s Full western blots

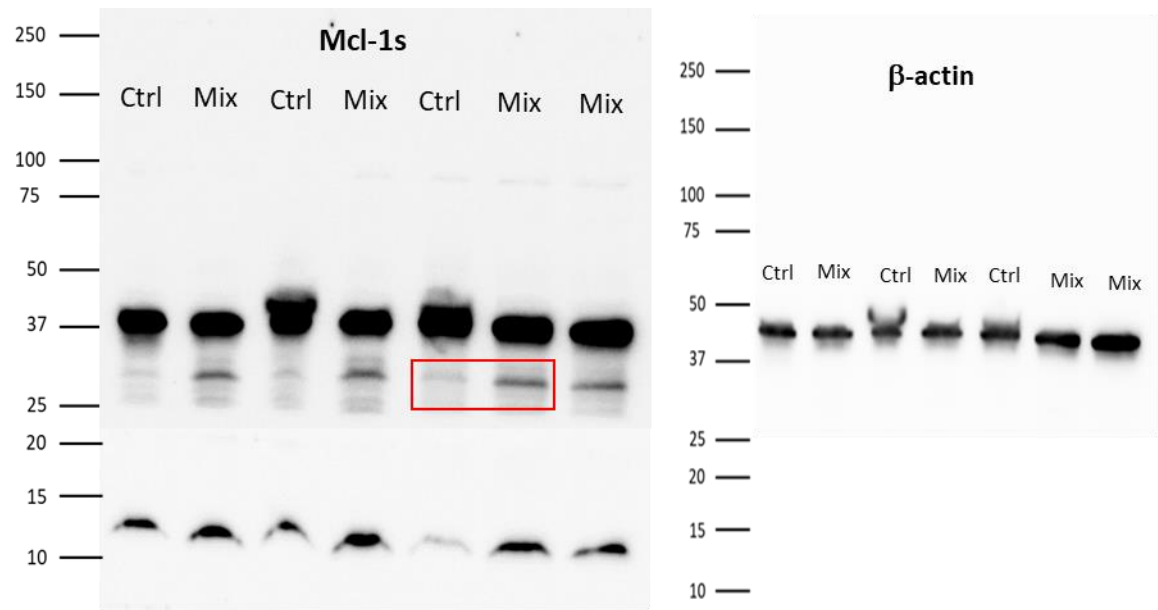

clv Cas-2 Full western blots

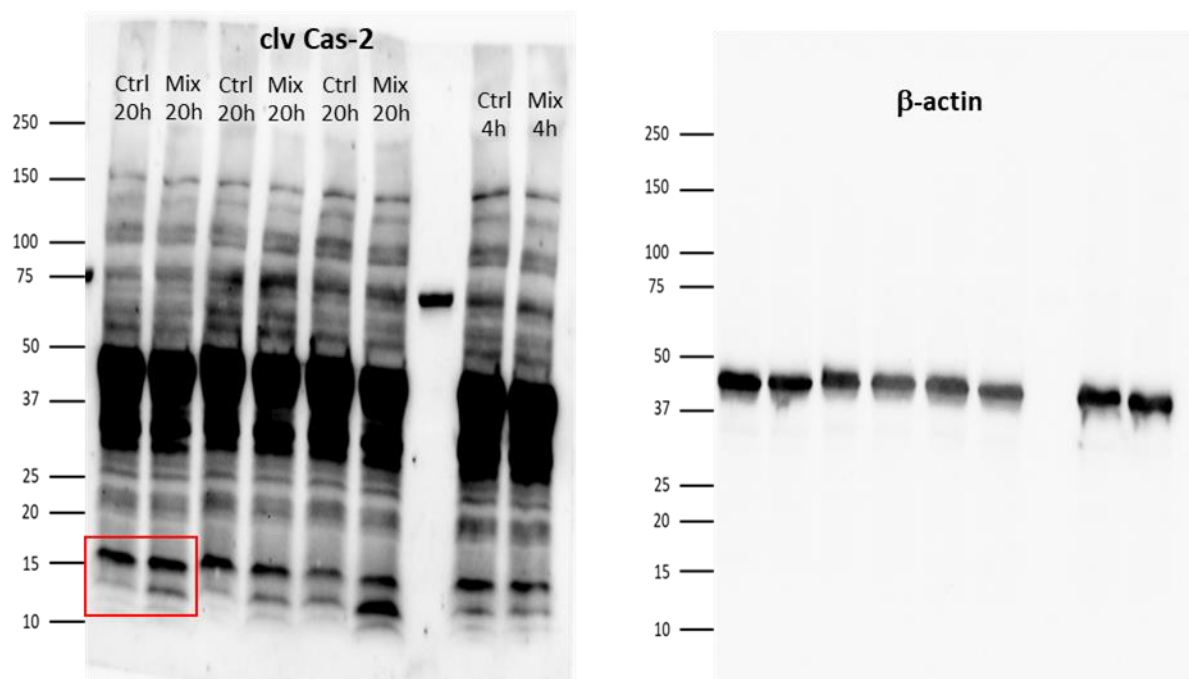

Survivin Full western blots

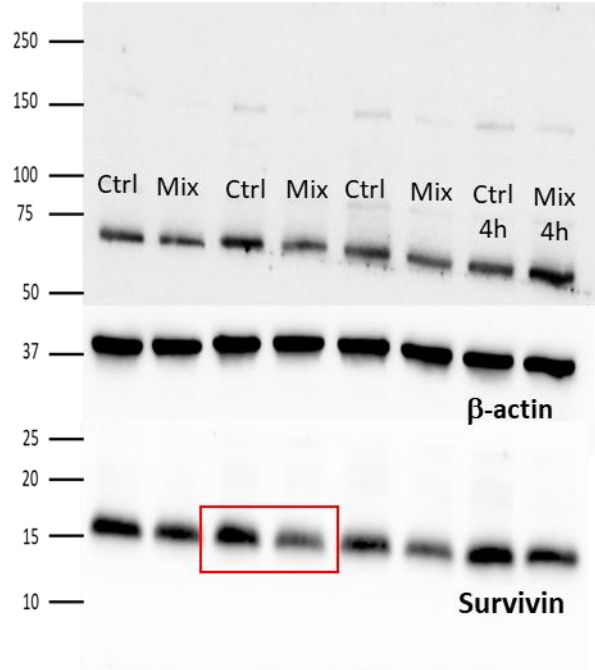

clv Cas-9 Full western blots

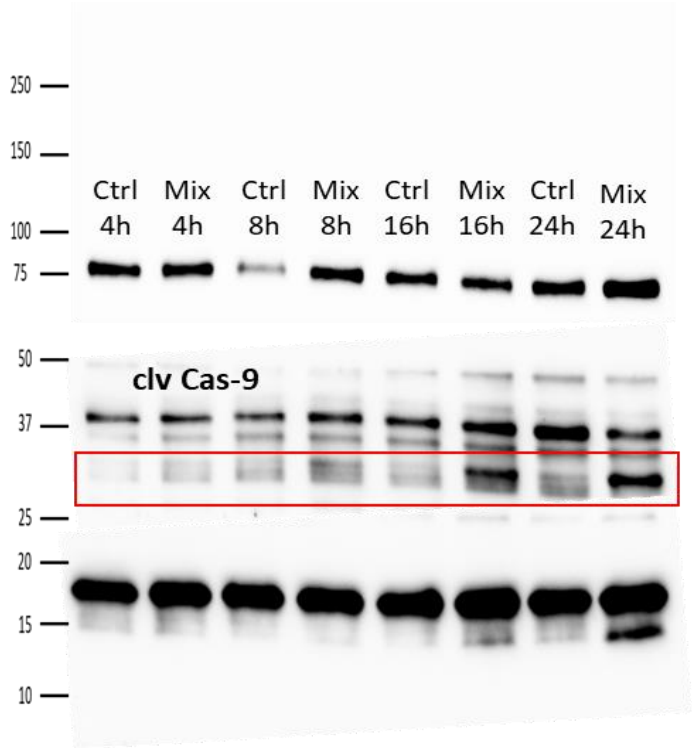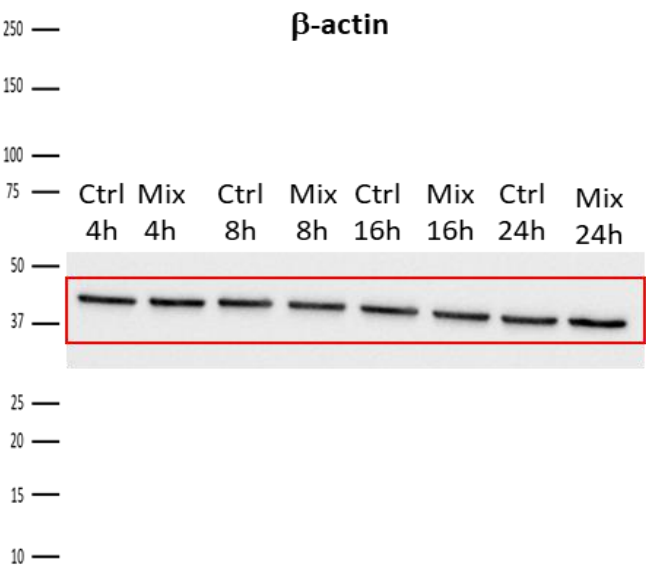

clv Cas-3 Full western blots

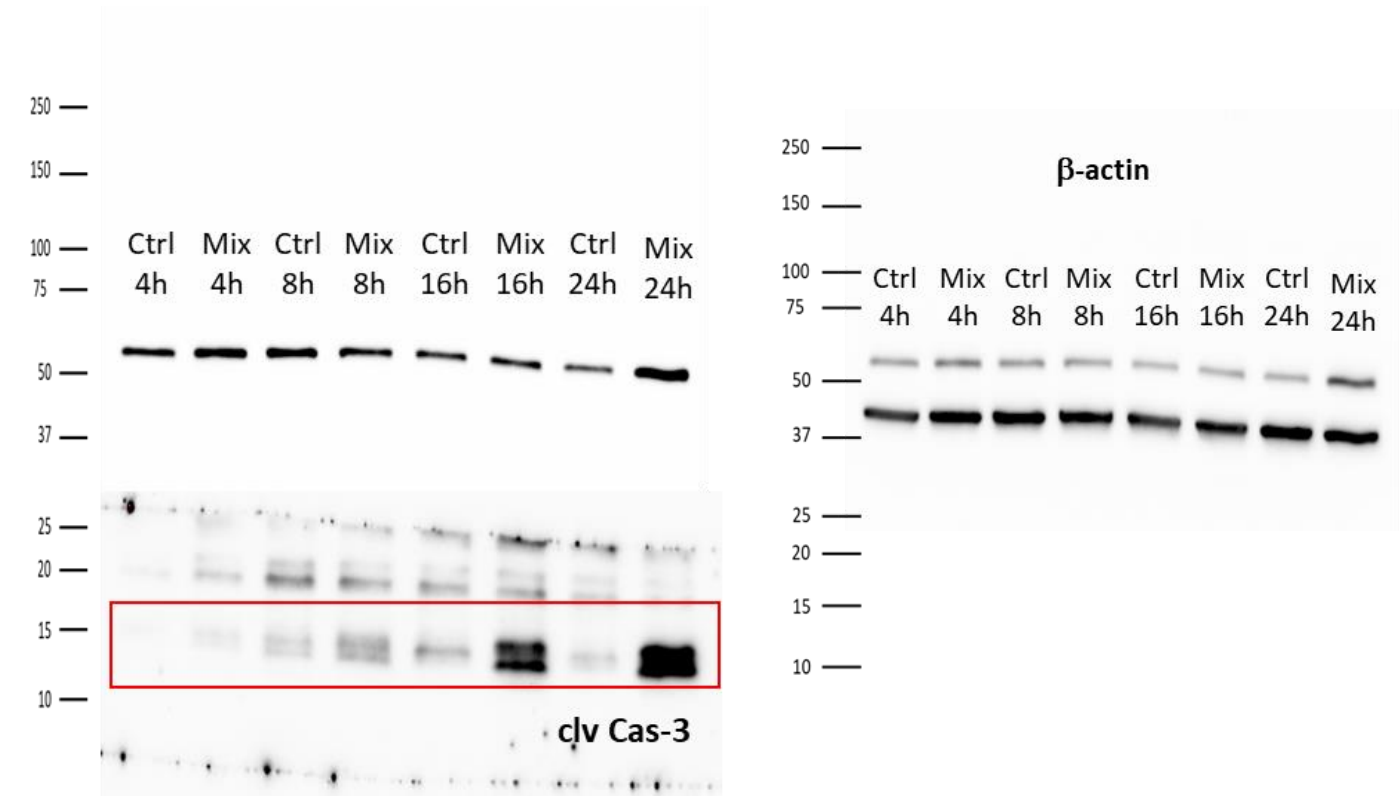

Supplement: s1 [file s1]
